# Supplementary material for: β1 integrins activate a MAPK signalling pathway in neural stem cells that contributes to their maintenance
Source: Oxford University Press journal article supplement (doi:10.1242/dev.01199), 2004-06-28
Supplement: dev01199-sup-s1_.pdf [file dev01199-sup-s1_.pdf]

## Campos et al - supplementary figure 1

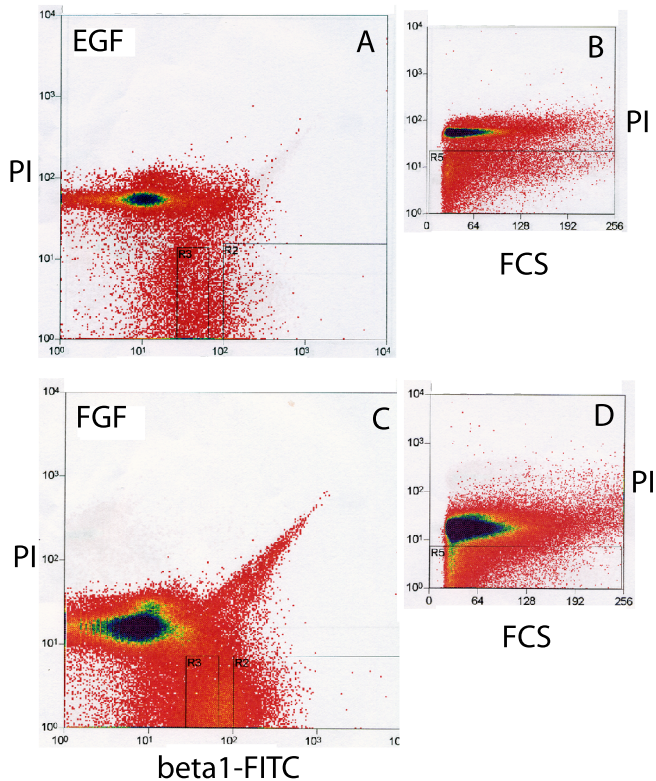

A representative experiment showing the FACS profiles and gates used to compare the sphere-forming potential of cells grown in EGF (A) or FGF (C) and sorted for high  $\beta 1$  expression (gate R2) or intermediate  $\beta 1$  expression (gate R3) with unsorted cells grown in EGF (B) or FGF (D) from which a single gate (high propidium iodide (PI)-R5) was used to remove dead cells. See text for results.
